# Supplementary material
Source: Springer Nature journal article supplement (https://www.springermedizin.de/resource/supplementary/12875_2013_1011_MOESM2_ESM.pdf/9435924)
Supplement: MOESM2 [file 9435924]

```
graph TD; A([Intervention]) --> B([Consumption]); B --> C([Risk]); C --> D([Harm]);
```

Intervention

Consumption

Risk

Harm
